# Supplementary material
Source: PubMed Central journal article supplement (PMC6309673)
Supplement: NIHMS1507990-supplement-8.pdf [file NIHMS1507990-supplement-8.pdf]

### ITEM S6. TIME-UPDATED ANALYSES USING PROPOSED METHOD.

Because our proposed method requires fitting a regression line to all eGFR values, the regression line can change as additional data are added. For prospective studies in which data are analyzed prior to the end of data collection, this implies that event times may change as the study progresses. To assess the impact of time-updated analyses, we limited NEPTUNE data to the first year, then first two years, then first three years, then first four years, and finally all five years of follow-up. The following table shows the number of events that changed from year to year.

| Previous year | Current year | Total # of events in current year | # patients with event in previous year but not in current year | # patients with event in previous and current year, but a different event time | Change in event time (previous year - current year), mean (range), years |
|---------------|--------------|-----------------------------------|----------------------------------------------------------------|--------------------------------------------------------------------------------|--------------------------------------------------------------------------|
| Y1            | Y2           | 52                                | 6                                                              | 14                                                                             | -0.5 (-1.2, -0.1)                                                        |
| Y2            | Y3           | 58                                | 8                                                              | 18                                                                             | -0.5 (-1.6, 0.2)                                                         |
| Y3            | Y4           | 63                                | 2                                                              | 24                                                                             | -0.4 (-1.5, 0.6)                                                         |
| Y4            | Y5           | 68                                | 2                                                              | 18                                                                             | -0.4 (-0.9, 0.2)                                                         |

Overall, there was a small number of patients for which previous year events were no longer considered events with another year of follow-up. This implies that there were small differences in power from year to year. While a moderate number of patients had changes in event times from year to year, the mean change was only about 6 months or less.

Since NEPTUNE is an observational study with pre-scheduled study visits, these findings may not generalize to a clinical setting. However, the NEPTUNE protocol was amended in 2014 such that all serum creatinine measures were recorded, including those collected during clinic visits that occurred between scheduled study visits. Since these data would more closely reflect routine clinical care, we repeated the time-updated analyses using all available eGFR values. The table below shows these results, which are similar to those above.

| Previous year | Current year | Total # of events in current year | # patients with event in previous year but not in current year | # patients with event in previous and current year, but a different event time | Change in event time (previous year - current year), mean (range), years |
|---------------|--------------|-----------------------------------|----------------------------------------------------------------|--------------------------------------------------------------------------------|--------------------------------------------------------------------------|
| Y1            | Y2           | 54                                | 6                                                              | 15                                                                             | -0.5 (-1, -0.1)                                                          |
| Y2            | Y3           | 57                                | 7                                                              | 29                                                                             | -0.5 (-1.6, 0.3)                                                         |
| Y3            | Y4           | 66                                | 5                                                              | 23                                                                             | -0.5 (-1.7, 0.2)                                                         |
| Y4            | Y5           | 72                                | 1                                                              | 21                                                                             | -0.4 (-1.3, 0.9)                                                         |
